# Supplementary material for: A photothermal and Fenton active MOF-based membrane for high-efficiency solar water evaporation and clean water production
Source: Royal Society of Chemistry journal article supplement (doi:10.1039/d0ta08101a), 2020-01-01
Supplement: d0ta08101a1.pdf [file d0ta08101a1.pdf]

# Electronic Supplementary Information

## Photothermal and Fenton active MOF-based membrane for high-efficient solar water evaporation and clean water production

*Xu Ma,<sup>a</sup> Zheng Deng,<sup>a\*</sup> Zhuoyi Li,<sup>a</sup> Danke Chen,<sup>a</sup> Xinyi Wan,<sup>a</sup> Xiaobin Wang,<sup>a</sup>*

*Xinsheng Peng<sup>a\*</sup>*

<sup>a</sup>State Key Laboratory of Silicon Materials, School of Materials Science and Engineering, ERC of Membrane and Water Treatment, Zhejiang University, Hangzhou 310027, People's Republic of China.

\* Correspondence and requests for materials should be addressed to Z. D. (email: dengzheng@zju.edu.cn) and X. P. (email: pengxinsheng@zju.edu.cn).

### **The file includes:**

SI-1 Detailed analysis of heat loss.

SI-2 Additional Figures and Tables.

### SI-1 Detailed analysis of heat loss.

Appropriate thermal management is critical to localize heat at the air/water evaporative interface. The heat loss mainly includes conduction, radiation and convection during stable evaporation, and the detailed analysis is listed as follow: <sup>S1-S5</sup>

#### (1) Radiation

The heat radiation loss of ZSM is estimated by Stefan-Boltzmann Equation.

$$\varphi_{rad} = \varepsilon A \sigma (T_1^4 - T_2^4) \quad (S1)$$

where  $\varphi_{rad}$  is heat radiation flux,  $\varepsilon$  is the emissivity of the ZSG membrane, which is 0.965 in this work,  $A$  is the surface area,  $\sigma$  is Stefan-Boltzmann constant ( $5.67 \times 10^{-8} \text{ W m}^{-2} \text{ K}^{-4}$ ),  $T_1$  is the surface temperature of ZSG membrane during evaporation (40.4 °C) and  $T_2$  is the ambient temperature upward the ZSG membrane (39.0 °C). This temperature was estimated from the ~ 5 mm part above the sample surface by thermocouple. The relative high temperature of  $T_2$  might be that, 1) in sun simulation system, the relatively short distance from Xe-lamp to the sample surface may induce the thermal radiation from the lamp to the ambient; 2) the water vapor is also carry heat. Therefore, the heat radiation loss is ~ 0.94% under 1 sun irradiation (1 kW m<sup>-2</sup>).

#### (2) Convection

The heat convection loss of ZSG is calculated by Newton's law of cooling.:

$$\varphi_{conv} = hA(T_1 - T_2) \quad (S2)$$

where  $\varphi_{conv}$  is heat convection flux,  $h$  is the convection heat transfer coefficient (5 W m<sup>-2</sup> K<sup>-1</sup>).  $T_1$  is the surface temperature of ZSG membrane during evaporation (40.4 °C) and  $T_2$  is the ambient temperature upward the ZSG membrane (39.0 °C). Therefore, the convection heat loss is ~0.7% under 1 sun irradiation.

#### (3) Conduction

The heat conduction loss of ZSM is calculated by the following formula:

$$Q = Cm\Delta T \quad (S3)$$

where  $Q$  is conduction heat loss from membrane to bulk water,  $C$  represents specific heat of bulk water (4.18 J g<sup>-1</sup> K<sup>-1</sup>),  $m$  is the weight of bulk water (40g) and  $\Delta T$  (~0 K) is the elevated bulk water temperature during evaporation. Therefore, the conduction heat loss is ~ 0% under 1 sun irradiation.

Based on equation S1, S2 and S3, the heat loss of this solar-driven interfacial water evaporation device is ~1.64%.

SI-2 Additional Figures and Tables.

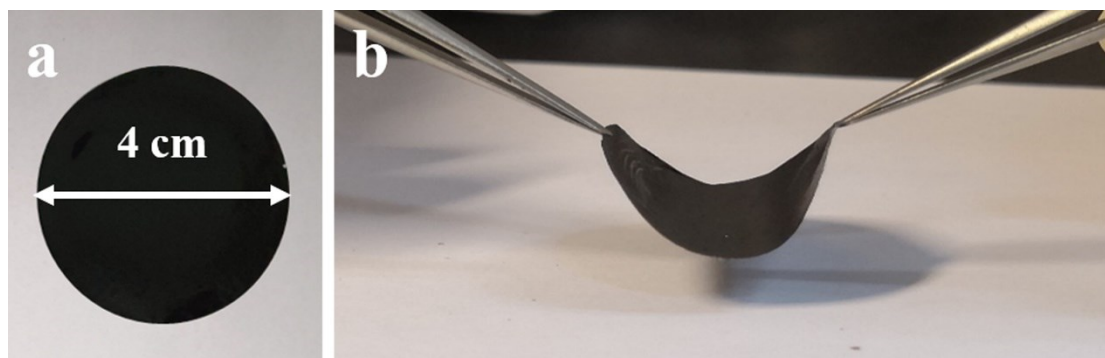

**Figure S1.** Digital images of a intact ZSG membrane on table (a) and the one (b) lifted by two pliers to show its flexibility.

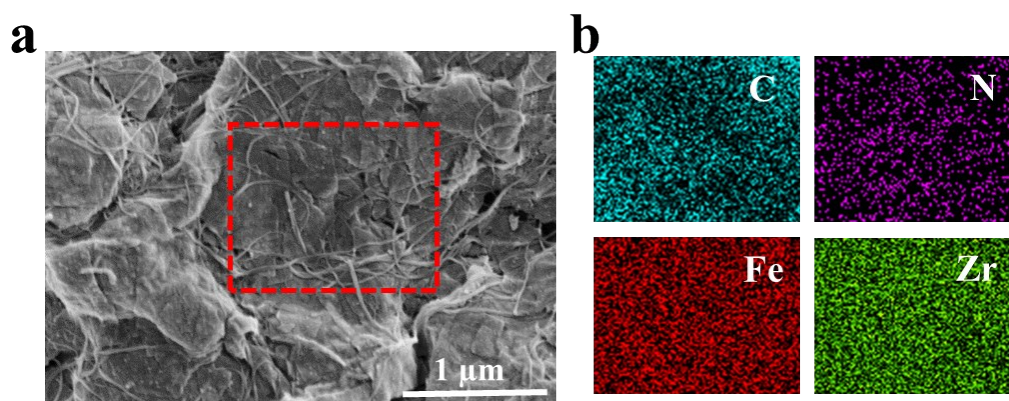

**Figure S1** (a) SEM image of the upper surface of ZSG; (b) Elements mapping images of C, N, Fe and Zr elements in the selected area in (a)

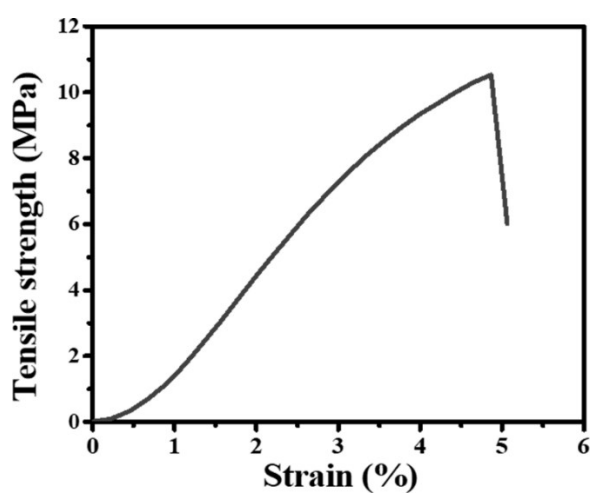

**Figure S3.** Stress-strain curve of ZSG membrane.

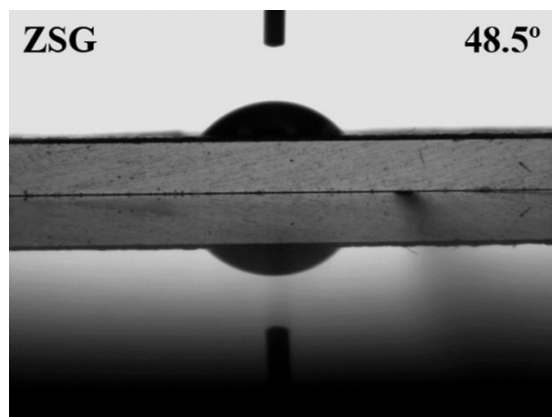

Figure S4. Water contact angle of ZSG membrane.

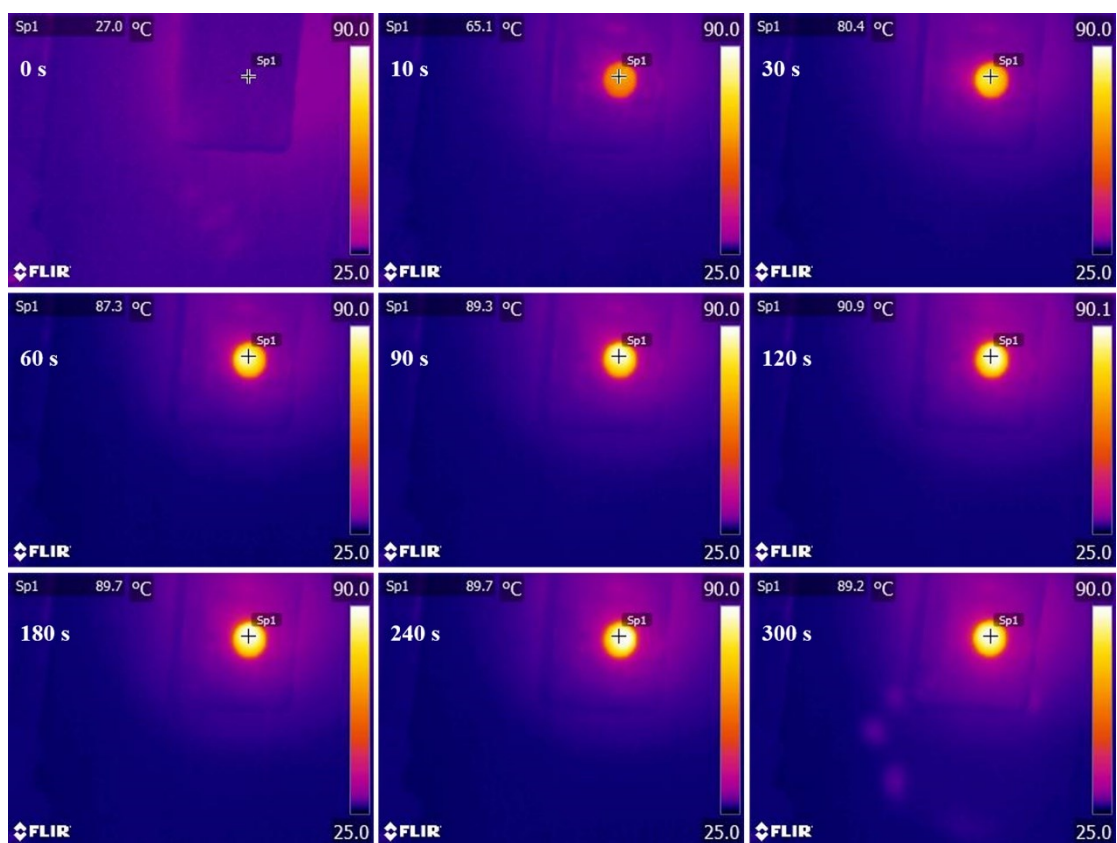

Figure S5. Infrared images of the dry ZSG membrane under 1 sun irradiation.

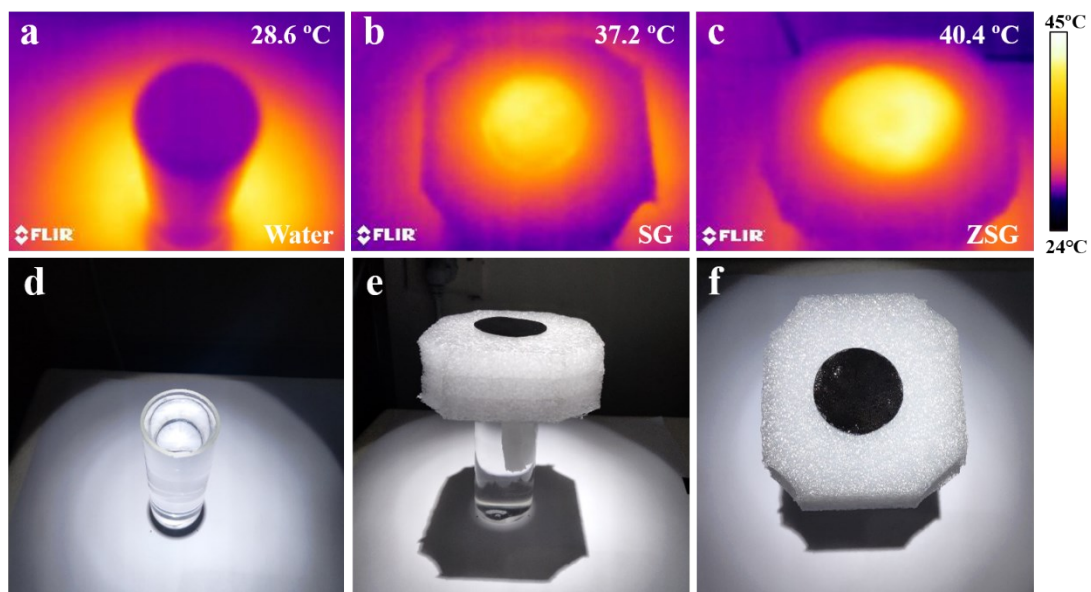

**Figure S6.** (a-c) Infrared images of water, SG and ZSG membrane during stable evaporation under 1 sun irradiation. (d-f) Digital images of the self-made water evaporation test device.

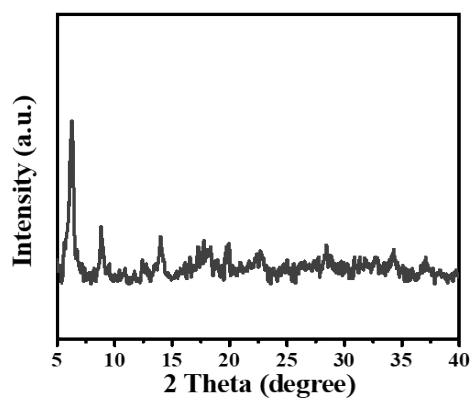

**Figure S7.** XRD patterns of ZSG membrane after long-term water evaporation test.

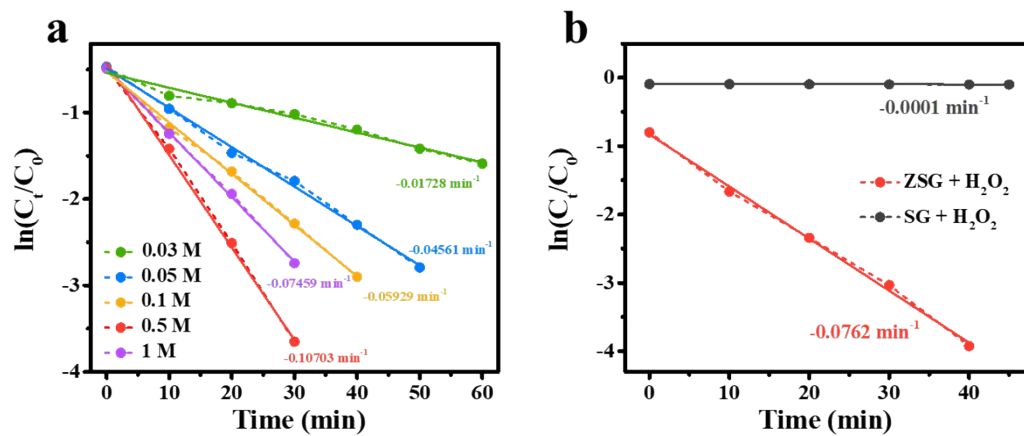

**Figure S8.** Degradation and the reaction kinetic study for MB under different conditions.

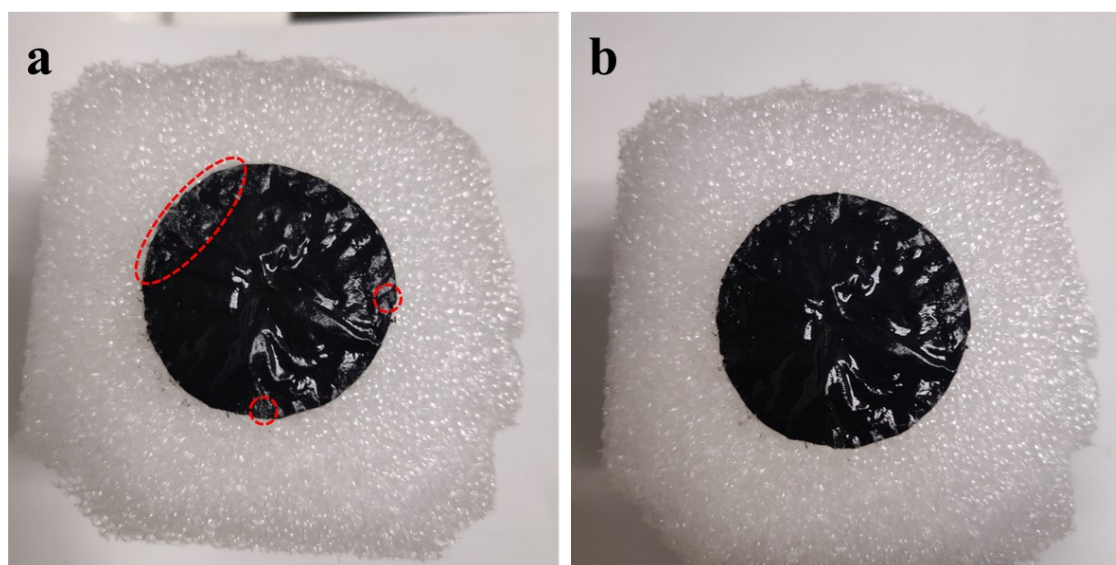

**Figure S9.** Digital images of (a) a small amount of salt precipitated on the surface of the ZSG membrane after 12 hours of solar irradiation; (b) the salt particles disappeared after 12 hours of standing at night.

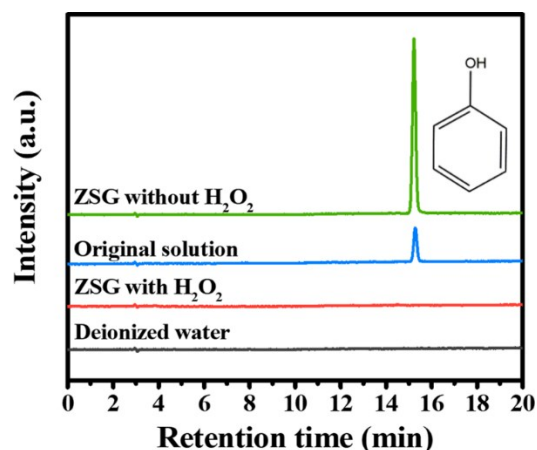

**Figure S10.** HPLC analysis of different samples using the mixture of ethanol and formic acid (0.1%) as mobile phase.

**Table S1.** The detailed calculation of solar-vapor efficiency.

|            | $T_0$<br>(°C) | $T$<br>(°C) | $\Delta T$<br>(°C) | $H_{sen}$<br>(Jg <sup>-1</sup> ) | $\Delta H_{vap}$<br>(Jg <sup>-1</sup> ) | $h_{LV}$<br>(Jg <sup>-1</sup> ) | Evaporation<br>rate<br>(kgm <sup>-2</sup> h <sup>-1</sup> ) | $\dot{m}$<br>(kgm <sup>-2</sup> h <sup>-1</sup> ) | Solar-vapor<br>efficiency<br>(%) |
|------------|---------------|-------------|--------------------|----------------------------------|-----------------------------------------|---------------------------------|-------------------------------------------------------------|---------------------------------------------------|----------------------------------|
| Pure water | 25.0          | 28.6        | 3.6                | 15.1                             | 2435.3                                  | 2450.4                          | 0.48                                                        | 0.37                                              | 25.2                             |
| SG         | 25.0          | 37.2        | 12.2               | 51.2                             | 2418.3                                  | 2469.5                          | 1.22                                                        | 1.10                                              | 75.5                             |
| ZSG        | 25.0          | 40.4        | 15.4               | 64.7                             | 2412.2                                  | 2476.9                          | 1.53                                                        | 1.39                                              | 95.6                             |

Note: The  $H_{sen}$  is calculated by  $H_{sen} = C \times (T - T_0)$  J/g, and the  $\Delta H_{vap}$  is calculated by  $\Delta H_{vap} = 1.91846 \times 103 [T / (T - 33.91)]^2$  J/g, where  $C$  is specific heat of water (4.18 J g<sup>-1</sup> K<sup>-1</sup>),  $T$  is the surface temperature during stable evaporation, and  $T_0$  is the initial temperature of water, respectively [S2].

## References

- [S1] X. Ma, W. Fang, Y. Guo, Z. Li, D. Chen, W. Ying, Z. Xu, C. Gao and X. Peng, *Small*, 2019, **15**, e1900354.
- [S2] X. Ma, W. Fang, W. Ying, D. Chen, Z. Li, Z. Deng, C. Gao and X. Peng, *Appl. Mater. Today*, 2020, **18**, 100459.
- [S3] C. Chen, Y. Li, J. Song, Z. Yang, Y. Kuang, E. Hitz, C. Jia, A. Gong, F. Jiang, J. Y. Zhu, B. Yang, J. Xie and L. Hu, *Adv. Mater.*, 2017, **29**, 1701756.
- [S4] T. Li, Q. Fang, X. Xi, Y. Chen and F. Liu, *J. Mater. Chem. A*, 2019, **7**, 586-593.
- [S5] P. Zhang, Q. Liao, T. Zhang, H. Cheng, Y. Huang, C. Yang, C. Li, L. Jiang and L. Qu, *Nano Energy*, 2018, **46**, 415-422.
